# Supplementary material
Source: PubMed Central journal article supplement (PMC3841973)
Supplement: NIHMS501462-supplement-Suppl_Data.pdf [file NIHMS501462-supplement-Suppl_Data.pdf]

## SUPPLEMENTARY MATERIALS

### ***Materials and Methods.***

#### **Patient Selection.**

Inclusion criteria:

1. CTCL patients age  $\geq 18$  and  $\leq 90$ .
2. At least T2 skin involvement and flow cytometric blood involvement after analysis by CD3+, CD4+, CD8+, CD4+CD7+, CD4+CD7-, CD4+CD26+, CD4+CD26-, CD25+, CD4+CD25+, CD45RO, CD4/CD8 ratios, positive PCR for TCR  $\beta/\gamma$ , and a panel of V $\alpha$  or V $\beta$  (Vonderheid et al, 2005; Vonderheid et al, 2006; Rappl et al, 2001).

Exclusion criteria:

1. Previous use of immunosuppressive regimens including multi-drug chemotherapy within 3 months.
  2. Known HIV or HTLV-1 positive patients.
  3. Pregnant or nursing mothers.
1. Vonderheid EC, Boselli CM, Conroy M, et al (2005). Evidence for restricted V $\beta$  usage in the leukemic phase of cutaneous T cell lymphoma. *J Invest Dermatol* 124(3):651-61.
  2. Vonderheid EC (2006). On the diagnosis of erythrodermic cutaneous T-cell lymphoma. *J Cutan Pathol* 33 Suppl 1:27-42.
  3. Rappl G, Mucic JM, Abken H, et al (2001). CD4(+)CD7(-) T cells compose the dominant T-cell clone in the peripheral blood of patients with Sézary syndrome. *J Am Acad Dermatol* 44(3):456-61.

Patients were selected from a pool of CTCL patients with the above inclusion and exclusion criteria based on clinical assessment and with evidence of blood involvement from FACS data, and who received treatment with photopheresis. At the same time, a reasonable diversity of clinical phenotypes and molecular markers on FACS analysis (such as CD4/CD8 ratios) ranging from predominantly early to late stage disease was also desired. Approval was received from Yale School of Medicine Human Investigation Committee (HIC protocols: 25269 and 23636).

**Clinical Data Collection.** Patient's current status, skin disease, PET/CT results and lymph node status on physical exam were categorized into "Improved," "Stable," or "Worsened." Current status was determined by physician global assessment. Skin disease was assessed taking into account changes over one year in body surface area and whether lesions were patches, plaques, tumors, or erythrodermic.

**Isolation of Malignant Cells From each CTCL patient.** 10 mL of lymphocyte-enriched blood was drawn in the final cycle of leukapheresis prior to 8-methoxypsoralen exposure. For the four normal controls, 50 mL of whole blood were drawn from volunteers chosen as most similar to the patient population based on age and sex. The blood sample was immediately layered on 4 mL of Isolymp (per 10 mL of blood, CTL Scientific Supply Corp.; Deer Park, NY) and processed as described by the manufacturer. Wash steps used 10 mL of RPMI (Gibco; Carlsbad, CA) with 1% penicillin-streptomycin followed by 10 min centrifugation at 1200 RPM, 20°C. An extra incubation at 4°C in lysis buffer (Sigma; St. Louis, MO) prior to the final centrifugation was performed on samples with a visible amount of red blood cells. Negative selection using CD7 and/or CD26 mAb conjugated to biotin (eBiosciences; San Diego, CA; Miltenyi Biotech; Auburn, CA) and anti-biotin microbeads (Miltenyi Biotech) was performed first followed by positive selection using anti-CD4 Microbeads (Miltenyi Biotech). Following manufacturer's instructions, populations were isolated using a Magnetic-bead Antibody Cell Sorting LS column and magnet (Miltenyi Biotech). Washes were done using filtered RPMI (Gibco) with 10% AB serum, 1% penicillin-streptomycin and 2mM EDTA.

**Affymetrix Human SNP 6.0 and Gene 1.0 ST array assay details.** 500ng of genomic DNA was input in the PCR based Affymetrix Human SNP 6.0 assay so approximately

225ug of fragmented and labeled PCR product was hybridized to the human SNP 6.0 arrays (Affymetrix). Total RNA (300ng) was input in the Affymetrix Whole Transcript assay utilizing in vitro transcription and a second round of first strand cDNA synthesis to create the sense targeted single stranded DNA needed for hybridization. The sscDNA was fragmented, labeled and approximately 2.5ug was hybridized to the human Gene 1.0 ST arrays (Affymetrix) at the Keck Microarray Core facility according to manufacturer specifications.

**Genomic Data Quality Controls.** Affymetrix Expression Console software using the gene level RMA algorithm on all samples as a batch was used to assess quality metrics for hybridization and assay performance for the Affymetrix human Gene 1.0 ST array. Perfect mean match were found to be in an acceptable range (298.2-402.7) compared to background values. Positive versus negative area under the ROC curve values to assess overall data quality were also acceptable (0.836-0.886). All samples run on the Affymetrix Human Genome wide SNP6.0 arrays were found to have acceptable contrast QC values (1.56-3.30) indicating sufficient contrast resolution quality for genotyping.

**Genomic Data Access.** All genomic data will be available in the GEO database (Accession number pending). Temporarily, the raw genomic data may be downloaded at: Login information: Username: WGEO Passcode: ctcl. Please click on "SIMPLE MENU," then "Download Affy, Illumina, Nimblegen Files from Keck." From there, click on individual CEL files to save them to a local directory. CTCL cell line data is available in 2 parts temporarily at:

[http://medapps12.med.yale.edu/MARR\\_Database/Keckaffylab/batch/WGEO\\_group\\_1\\_18671.zip](http://medapps12.med.yale.edu/MARR_Database/Keckaffylab/batch/WGEO_group_1_18671.zip) and

[http://medapps12.med.yale.edu/MARR\\_Database/Keckaffylab/batch/WGEO\\_group\\_2\\_18671.zip](http://medapps12.med.yale.edu/MARR_Database/Keckaffylab/batch/WGEO_group_2_18671.zip)

**GISTIC Parameters.** genome build: hg18, amplifications threshold: 0.1, deletions threshold: 0.1, join.segment.size: 8, qv.thresh: 0.25, remove.X: 1. Copy number variants were removed as part of the GISTIC algorithm based on a University of Toronto database of genomic variants (file: variation.hg18.v8.txt)

**Comparative Marker Selection Parameters.** test.direction = 2, test.statistic = 0, number.of.permutations = 1000, complete = false, balanced = false, random.seed = 779948241, smooth.p.values = true.

**Hierarchical Clustering of GISTIC lesions.** In a particular cell, no amplification or deletion was assigned a value of 0, a low-level amplification or deletion ( $0.1 < \log_2(\text{copy number in region-1}) < 0.9$ ) was assigned a value of 1, and high level amplification or deletion ( $0.9 < \log_2(\text{copy number in region-1})$ ) was assigned a value of 2.

**Supplementary Table 1. Significant regions of DNA copy number amplifications and deletions in leukemic CTCL based upon GISTIC analysis of 23 patient samples.**

**Supplementary Table 2. Summary of study characteristics used in the consensus analysis**

**Supplementary Table 3. Details about individual cell lines including origin, culture media, and references.**

**Supplementary Table 4. Significant regions of DNA copy number amplifications and deletions in leukemic CTCL based upon GISTIC analysis of 5 patient samples.**

**Supplementary Table 5. FACS data from 24 patients with leukemic CTCL.**

**Supplementary Table 1a: Significant regions of DNA copy number amplification in CTCL**

| Rank | Cytoband | Q-Value  | Number of Samples | Region                   | Genes in region                                                                                                                                                                                                                                                                                                                                                                                                                                                                                                                                                                                                                                                                                                                                                                                                                                   | Genes of interest related to region                                 |
|------|----------|----------|-------------------|--------------------------|---------------------------------------------------------------------------------------------------------------------------------------------------------------------------------------------------------------------------------------------------------------------------------------------------------------------------------------------------------------------------------------------------------------------------------------------------------------------------------------------------------------------------------------------------------------------------------------------------------------------------------------------------------------------------------------------------------------------------------------------------------------------------------------------------------------------------------------------------|---------------------------------------------------------------------|
| 1    | 8q23.3   | 3.44E-08 | 14                | chr8:112360671-115742135 | 1 gene: CSMD3                                                                                                                                                                                                                                                                                                                                                                                                                                                                                                                                                                                                                                                                                                                                                                                                                                     | <b>MYC*</b>                                                         |
| 2    | 17q25.1  | 1.84E-05 | 8                 | chr17:40531449-75546555  | 371 genes                                                                                                                                                                                                                                                                                                                                                                                                                                                                                                                                                                                                                                                                                                                                                                                                                                         | <b>NGFR, PHB, RPS6KB1, BPTF, GRB2, ITGB4, MIR21, PRKAR1A, USP32</b> |
| 3    | 1p36.13  | 0.000945 | 5                 | chr1:19256834-19274554   | 1 gene: UBR4                                                                                                                                                                                                                                                                                                                                                                                                                                                                                                                                                                                                                                                                                                                                                                                                                                      | -                                                                   |
| 4    | 3p11.1   | 0.00429  | 8                 | chr3:90106010-96880237   | 5 genes: PROS1, NSUN3, ARL13B, DHFRL1, STX19                                                                                                                                                                                                                                                                                                                                                                                                                                                                                                                                                                                                                                                                                                                                                                                                      | <b>POU1F1*</b>                                                      |
| 5    | 6p21.1   | 0.00596  | 2                 | chr6:43979350-43993064   | 1 gene: C6orf223                                                                                                                                                                                                                                                                                                                                                                                                                                                                                                                                                                                                                                                                                                                                                                                                                                  | <b>VEGFA*</b>                                                       |
| 6    | 8p23.3   | 0.00950  | 8                 | chr8:577114-1646102      | 2 genes: DLGAP2, ERICH1                                                                                                                                                                                                                                                                                                                                                                                                                                                                                                                                                                                                                                                                                                                                                                                                                           | -                                                                   |
| 7    | 10p13    | 0.0128   | 3                 | chr10:4275516-17978213   | 75 genes: PFKFB3, PTPLA, ST8SIA6, STAM, OLAH, AKR1C3, CDC123, GATA3, SEC61A2, NUDT5, ACBD7, PRKCO, VIM, SFMBT2, IL2RA, OPTN, FBXO18, USP6NL, RBM17, HSPA14, TAF3, AKR1CL1, IAKR, PHYH, TRDMT1, KIN, C10orf31, MCM10, ANKRD16, CALML5, ECHDC3, AKR1CL2, AKR1C2, CAMK1D, DHTKD1, C10orf111, IL15RA, DCLRE1C, MEIG1, ITGA8, LOC439951, FLJ45983, RPP38, PRPF18, ASB13, F5U1, TCEB1P3, FAM107B, CUGBP2, FRMD4A, AKR1C1, SEPHS1, ATP5C1, AKR1C4, GD12, C10orf18, C10orf97, CUBN, SUV39H2, C10orf49, C10orf47, ARMETL1, UCN3, C1QL3, ITIH2, UPF2, TUBAL3, LOC100128356, NMT2, LOC389936, CALML3                                                                                                                                                                                                                                                         | <b>GATA3</b>                                                        |
| 8    | 5p15.33  | 0.0204   | 5                 | chr5:2179815-3322657     | 2 genes: C5orf38, IRX2                                                                                                                                                                                                                                                                                                                                                                                                                                                                                                                                                                                                                                                                                                                                                                                                                            | <b>TERT*</b>                                                        |
| 9    | 10p12.33 | 0.0204   | 3                 | chr10:1-135374737        | 717 genes                                                                                                                                                                                                                                                                                                                                                                                                                                                                                                                                                                                                                                                                                                                                                                                                                                         | -                                                                   |
| 10   | 22q11.23 | 0.0320   | 9                 | chr22:20471826-21907111  | 13 genes: hsa-mir-650, BCR, GNAZ, MAPK1, VPREB1, TOP3B, RAB36, PPM1F, PRAME, RTDR1, GGTL2, ZNF280A, ZNF280B                                                                                                                                                                                                                                                                                                                                                                                                                                                                                                                                                                                                                                                                                                                                       | <b>CRKL*</b>                                                        |
| 11   | 7q35     | 0.0362   | 5                 | chr7:142856201-158821424 | 103 genes: hsa-mir-595, hsa-mir-153-2, hsa-mir-671, ABP1, CDK5, DPP6, EN2, EZH2, GBX1, MNX1, HTR5A, INSIG1, KCNH2, NOS3, PTPRN2, RARRES2, RHEB, SHH, SLC4A2, SMARCD3, VIPR2, XRCC2, ARHGEF5, ZNF212, ZNF282, CUL1, ACCN3, PDIA4, UBE3C, FAM115A, DNAJB6, ABCF2, FASTK, ABCB8, PAXIP1, SSPO, CNTNAP2, GIMAP2, ORF21, TPK1, ZNF777, TMEM176B, REPIN1, PRKAG2, NUB1, CSG1A-T, NCAPG2, WDR60, GIMAP4, GIMAP5, TMEM176A, ACTR3B, FAM62B, ZNF398, MLL3, GALNT11, LMBR1, NOM1, LRRRC61, ZNF767, TMUB1, KRBA1, C7orf29, CENTG3, NOBOX, OR2A14, OR6B1, OR2F2, ZNF786, ASB10, RNF32, GIMAP8, CRYGN, ZNF425, ZNF783, ZNF746, ATP6V0E2, CCT8L1, RBM33, GALNTL5, GIMAP7, ZNF467, GIMAP1, C7orf33, TAS2R41, CNPY1, FAM139A, ZNF775, ATG9B, CTAGE6, OR2A12, OR2A1, WDR86, OR2A25, OR2A5, OR2A7, OR2A42, LOC402715, LOC441294, OR2A2, FLJ43692, GIMAP6, LOC643641 | -                                                                   |
| 12   | 1q42.3   | 0.0410   | 2                 | chr1:232738038-232763374 | 1 gene: IRF2BP2                                                                                                                                                                                                                                                                                                                                                                                                                                                                                                                                                                                                                                                                                                                                                                                                                                   | -                                                                   |
| 13   | 4q12     | 0.0467   | 4                 | chr4:55224058-55239617   | 1 gene: KIT                                                                                                                                                                                                                                                                                                                                                                                                                                                                                                                                                                                                                                                                                                                                                                                                                                       | <b>KIT</b>                                                          |
| 14   | 7p11.2   | 0.0531   | 3                 | chr7:54899474-65012069   | 20 genes: CCT6A, EGFR, GBAS, PHKG1, PSPH, ZNF138, ZNF273, SUMF2, CHCHD2, ZNF117, MRPS17, ZNF107, LANCL2, ECOP, ZNF479, VKORC1L1, ZNF92, ZNF680, 14-Sep, ZNF713                                                                                                                                                                                                                                                                                                                                                                                                                                                                                                                                                                                                                                                                                    | <b>EGFR</b>                                                         |
| 15   | 4q13.1   | 0.0780   | 9                 | chr4:63139114-63362224   | 1 gene: LPHN3                                                                                                                                                                                                                                                                                                                                                                                                                                                                                                                                                                                                                                                                                                                                                                                                                                     | -                                                                   |
| 16   | 20q13.2  | 0.0894   | 1                 | chr20:1-62435964         | 520 genes                                                                                                                                                                                                                                                                                                                                                                                                                                                                                                                                                                                                                                                                                                                                                                                                                                         | <b>ZNF217</b>                                                       |
| 17   | 21q22.3  | 0.156    | 1                 | chr21:39772858-46944323  | 88 genes: ADARB1, AIRE, PTTG1P, C21orf2, CBS, COL6A1, COL6A2, CRYAA, CSTB, DSCAM, PRMT2, ITGB2, LSS, MX1, MX2, NDUFV3, PCNT, PCP4, PDE9A, PFKL, PKNOX1, PWP2, S100B, SH3BGR, SLC19A1, SUMO3, TFF1, TFF2, TFF3, TMEM1, TMPRSS2, TRPM2, UZAF1, UBE2G2, C21orf33, PDXK, RRP1, MCM3AP, ABCG1, B3GALT5, WDR4, FTCD, HSF2BP, RRP1B, DIP2A, POPUT2, ICOSLG, BACE2, C2CD2, DNMT3L, ZNF295, UBASH3A, SLC37A1, PCBP3, C21orf58, C21orf57, C21orf29, FAM3B, RIFK4, AGPAT3, PRDM15, TMPRSS3, COL18A1, LRRC3, C21orf56, C21orf70, RSPH1, UMODL1, IGSF5, SNF1LK, PLAC4, KRTAP12-2, KRTAP12-1, KRTAP10-10, C21orf123, KRTAP10-4, KRTAP10-6, KRTAP10-7, KRTAP10-9, KRTAP10-1, KRTAP10-11, KRTAP10-2, KRTAP10-3, KRTAP10-5, KRTAP10-8, KRTAP10-12, KRTAP12-4, KRTAP10-12                                                                                           | -                                                                   |

1. Rank according to Q-value. Q-value are false-discovery rate corrected.

2. Cytoband from the middle of the minimal common region.

3. Region represents the wider area that results when the samples defining each border of the minimal common region are left out.

4. Genes of interest related to region:

**Genes in bold** represent significantly amplified genes in cancer from Beroukhim *et al.* (PMID: 20164920, Supplementary Table 2: GISTIC analysis of 3,131 cancer specimens of 26 tumor types).

*Genes in italics* represent genes that are in the region that are mentioned in the text

Genes with \* represent genes adjacent to the region

**Supplementary Table 1b: Significant regions of DNA copy number deletion in CTCL**

| Rank | Cytoband | Q-value  | Number of samples | Region                   | Genes in region                                                                                                                                                                                                                                                                                                                                                                                                                                                                                                                                                                                                                                                                                                                                                         | Genes of interest related to region |
|------|----------|----------|-------------------|--------------------------|-------------------------------------------------------------------------------------------------------------------------------------------------------------------------------------------------------------------------------------------------------------------------------------------------------------------------------------------------------------------------------------------------------------------------------------------------------------------------------------------------------------------------------------------------------------------------------------------------------------------------------------------------------------------------------------------------------------------------------------------------------------------------|-------------------------------------|
| 1    | 17p12    | 1.73E-07 | 10                | chr17:15524281-15794764  | 4 genes: ADORA2B, TRIM16, ZNF286A, TBC1D26                                                                                                                                                                                                                                                                                                                                                                                                                                                                                                                                                                                                                                                                                                                              | MAP2K4*, ZNF18*                     |
| 2    | 17q25.3  | 1.73E-07 | 12                | chr17:78226063-78242141  | 1 gene: RAB40B                                                                                                                                                                                                                                                                                                                                                                                                                                                                                                                                                                                                                                                                                                                                                          | ZNF750*                             |
| 3    | 10p11.22 | 6.79E-06 | 4                 | chr10:30673943-31410094  | 4 genes: MAP3K8, PAPP1, LYZL2, ZNF438                                                                                                                                                                                                                                                                                                                                                                                                                                                                                                                                                                                                                                                                                                                                   | -                                   |
| 4    | 7q21.2   | 1.74E-05 | 7                 | chr7:91195291-91198925   | 1 gene: MTERF                                                                                                                                                                                                                                                                                                                                                                                                                                                                                                                                                                                                                                                                                                                                                           | -                                   |
| 5    | 17p13.3  | 1.74E-05 | 14                | chr17:2109320-2748547    | 10 genes: MNT, PAFAH1B1, SGSM2, GARNL4, KIAA0664, SMG6, TSR1, SRR, METT10D, LOC284009                                                                                                                                                                                                                                                                                                                                                                                                                                                                                                                                                                                                                                                                                   | TP53*, ATP1B2*                      |
| 6    | 16p12.3  | 1.86E-05 | 6                 | chr16:19711348-19743071  | 1 gene: IQCK                                                                                                                                                                                                                                                                                                                                                                                                                                                                                                                                                                                                                                                                                                                                                            | -                                   |
| 7    | 1q31.2   | 0.000481 | 5                 | chr1:191421896-191426345 | 2 genes: B3GALT2, CDC73                                                                                                                                                                                                                                                                                                                                                                                                                                                                                                                                                                                                                                                                                                                                                 | -                                   |
| 8    | 8p11.21  | 0.000481 | 7                 | chr8:42269520-42277830   | 1 gene: IKBKB                                                                                                                                                                                                                                                                                                                                                                                                                                                                                                                                                                                                                                                                                                                                                           | C8orf4*, ZMAT4*                     |
| 9    | 10q23.33 | 0.00288  | 4                 | chr10:60671322-97354704  | 211 genes                                                                                                                                                                                                                                                                                                                                                                                                                                                                                                                                                                                                                                                                                                                                                               | PTEN                                |
| 10   | 10p11.23 | 0.00346  | 7                 | chr10:29478793-30143973  | 4 genes: hsa-mir-938, hsa-mir-604, SVIL, LYZL1                                                                                                                                                                                                                                                                                                                                                                                                                                                                                                                                                                                                                                                                                                                          | -                                   |
| 11   | 9p21.3   | 0.00376  | 3                 | chr9:21790514-22605798   | 4 genes: CDKN2A, CDKN2B, MTAP, DMRTA1                                                                                                                                                                                                                                                                                                                                                                                                                                                                                                                                                                                                                                                                                                                                   | CDKN2A                              |
| 12   | 2q37.1   | 0.0121   | 3                 | chr2:232785309-232823401 | 1 gene: DIS3L2                                                                                                                                                                                                                                                                                                                                                                                                                                                                                                                                                                                                                                                                                                                                                          | TMEM16G, ING5                       |
| 13   | 12q15    | 0.0121   | 3                 | chr12:66948191-66954650  | 1 gene: IL22                                                                                                                                                                                                                                                                                                                                                                                                                                                                                                                                                                                                                                                                                                                                                            | -                                   |
| 14   | 12q21.1  | 0.0121   | 3                 | chr12:69853599-69876390  | 1 gene: TSPAN8                                                                                                                                                                                                                                                                                                                                                                                                                                                                                                                                                                                                                                                                                                                                                          | -                                   |
| 15   | 4p13     | 0.0128   | 4                 | chr4:43100100-43137404   | 1 gene: LOC389207                                                                                                                                                                                                                                                                                                                                                                                                                                                                                                                                                                                                                                                                                                                                                       | -                                   |
| 16   | 8p23.2   | 0.0133   | 4                 | chr8:3570501-12646620    | 57 genes: hsa-mir-598, hsa-mir-124a-1, hsa-mir-597, ANGPT2, BLK, CTSB, DEFA1, DEFA3, DEFA4, DEFA5, DEFA6, DEFB1, DEFB4, DFDT1, GATA4, MSRA, TNKS, MFHAS1, SPAG11B, PINX1, AGPAT5, DEFB103A, CSMD1, MTRMR9, MCPH1, PPP1R3B, SOX7, C8orf13, AMAC1L2, FAM86B1, THEX1, LONRF1, RP1L1, CLDN23, DEFB104A, PRAGMIN, UNG9391, C8orf74, DEFB105A, DEFB106A, DEFB107A, DEFB130, NEIL2, XKR6, DUB3, XKR5, DEFB103B, DEFB107B, DEFB104B, DEFB106B, DEFB105B, DEFB136, DEFB137, DEFB134, SPAG11A, LOC728358, LOC728957,                                                                                                                                                                                                                                                              | CSMD1                               |
| 17   | 22q11.23 | 0.0144   | 6                 | chr22:22564665-23056324  | 10 genes: DDT, GGT5, GSTT1, GSTT2, MIF, SPECC1L, CABIN1, SUSD2, GSTT2B, DDTL                                                                                                                                                                                                                                                                                                                                                                                                                                                                                                                                                                                                                                                                                            | VPREB1*                             |
| 18   | 7p21.1   | 0.0150   | 3                 | chr7:16820392-17640380   | 2 genes: AHR, AGR3                                                                                                                                                                                                                                                                                                                                                                                                                                                                                                                                                                                                                                                                                                                                                      | -                                   |
| 19   | 9q21.2   | 0.0184   | 5                 | chr9:80289820-92881841   | 43 genes: hsa-mir-7-1, CKS2, CTSL1, DAPK1, EDG3, GAS1, HNRPK, NTRK2, SYK, TLE1, TLE4, SEMA4D, GADD45G, SPIN1, AGTPBP1, CCRK, UBQLN1, GOLM1, SHC3, DIRAS2, KIF27, MAK10, SLC28A3, SECISBP2, ZCCHC6, RMI1, GKAP1, ISCA1, C9orf64, NXNL2, RASEF, FRMD3, C9orf47, C9orf79, LOC286238, C9orf164, FLJ46321, C9orf153, CTSL3, FLJ45537, FAM75B, C9orf103, CHCHD9                                                                                                                                                                                                                                                                                                                                                                                                               | -                                   |
| 20   | 13q21.1  | 0.0184   | 4                 | chr13:54591155-54593583  | 1 gene: FLJ40296                                                                                                                                                                                                                                                                                                                                                                                                                                                                                                                                                                                                                                                                                                                                                        | RB1*                                |
| 21   | 12p13.2  | 0.0399   | 7                 | chr12:10860835-11642691  | 18 genes: PRB1, PRB3, PRB4, PRH1, PRH2, PRR4, TAS2R13, TAS2R10, TAS2R14, TAS2R43, TAS2R44, TAS2R46, TAS2R47, TAS2R48, TAS2R49, TAS2R50, TAS2R42, PRB2                                                                                                                                                                                                                                                                                                                                                                                                                                                                                                                                                                                                                   | ETV6*                               |
| 22   | 6q24.1   | 0.0596   | 3                 | chr6:141733503-163657589 | 99 genes: ACAT2, ESR1, FUCA2, GRM1, HIVEP2, IGF2R, LPA, MAS1, MAP3K4, NMBR, OPRM1, PARK2, PCMT1, PLAGL1, PLG, SLC22A1, SLC22A3, SLC22A2, SOD2, TCP1, DYNLT1, UTRN, EZR, VIP, EPM2A, PEX3, STX11, SYNJ2, LATS1, WTAP, AKAP12, PHACTR2, UST, RAB32, KATNA1, RBM16, MAP3K7IP2, SASH1, SYNE1, MTHFD1L, PIP3-E, TIAM2, FBXO5, RGS17, MRPL18, CLDN20, NOX3, TFB1M, AIG1, SNX9, VTA1, MTRF1L, RMND1, AGPAT4, TULP4, GPR126, PLEKHG1, ARID1B, TMEM181, ZBTB2, ULBP3, C6orf211, ZDHHC14, C6orf103, C6orf97, MYCT1, ULBP2, ULBP1, LPAL2, PPP1R14C, SF3B5, RSPH3, FBXO30, FNDC1, LRP11, LTV1, SERAC1, PPIL4, SYTL3, C6orf72, TAGAP, ADAT2, STXBP5, PACRG, RAET1E, CNKSR3, RAET1L, PNLDC1, LOC202459, SHPRH, ZC3H12D, NUP43, RAET1G, C6orf98, SUMO4, SAMD5, IYD, LOC389435, GTF2H5, | -                                   |
| 23   | 10q21.1  | 0.0596   | 4                 | chr10:50229783-58152761  | 27 genes: hsa-mir-605, CHAT, ERCC6, MBL2, MSMB, PRKG1, SLC18A3, NCOA4, PARG, TIMM23, ZWINT, DKK1, CSTF2T, A1CF, FAM21B, OGDHL, ASAH2, PCDH15, SGMS1, PGBD3, C10orf53, FAM21A, CTGLF3, DRGX, CTGLF4, ASAH2B, CTGLF5                                                                                                                                                                                                                                                                                                                                                                                                                                                                                                                                                      | -                                   |
| 24   | 19p13.3  | 0.0596   | 11                | chr19:3178103-5466792    | 54 genes: hsa-mir-7-3, hsa-mir-637, DAPK3, EEF2, MATK, NFIC, MAP2K2, PTPRS, SH3GL1, TBXA2R, APBA3, CHAF1A, EB13, M6PRBP1, HMG20B, SEMA6B, JMJD2B, ZFR2, PIP5K1C, TJP3, ITGB1BP3, UHRF1, ZBTB7A, FZR1, SIRT6, PIAS4, FEM1A, STAP2, CCDC94, C19orf10, SHD, C19orf29, BRUNOL5, FSD1, UBXD1, DOHH, CREB3L3, HDGF2, RAX2, MPND, ATCAY, DPP9, MRPL54, LRG1, TMI2D2, TNFAIP8L1, C19orf28, GIPC3, TICAM1, ZNRF4, ANKRD24, LSDP5, ARRC5, KIAA1881                                                                                                                                                                                                                                                                                                                                | GZMM*, THEG*, PPAP2C*, C19orf20*    |
| 25   | 10p15.1  | 0.0610   | 3                 | chr10:3931317-3941491    | 1 gene: KLF6                                                                                                                                                                                                                                                                                                                                                                                                                                                                                                                                                                                                                                                                                                                                                            | -                                   |
| 26   | 3q11.2   | 0.0676   | 2                 | chr3:99583690-99616246   | 1 gene: OR5K3                                                                                                                                                                                                                                                                                                                                                                                                                                                                                                                                                                                                                                                                                                                                                           | -                                   |
| 27   | 3q13.2   | 0.0849   | 2                 | chr3:113854947-124236792 | 70 genes: hsa-mir-198, hsa-mir-568, ADPRH, ATP6V1A, CASR, CD80, CD86, CSTA, DRD3, GAP43, GOLGB1, GSK3B, GTF2E1, HCLS1, HGD, KPNA1, LSAMP, NDUFB4, SLC15A2, UPK1B, ZNF80, B4GALT4, NR112, STXBP5L, IQCB1, COX17, PDLQ, FSTL1, C3orf17, ZBTB20, C3orf28, GTPBP8, C3orf1, PLA1A, FBXO40, SEMA5B, WDR5B, PAPP14, GRAMD1C, SIDT1, TMEM39A, WDR52, EAF2, KTEL1, CDGAP, KIAA1407, POPDC2, HSPBAP1, QTRTD1, NAT13, PAPP9, DIRC2, C3orf15, BOC, LRRC58, CCDC58, CD200R1, DTX3L, CCDC52, IGSF11, C3orf30, PAPP15, GPR156, VSTM3, KIAA2018, ZDHHC23, RABL3, ILDR1, CD200R2, ARGFX                                                                                                                                                                                                  | LSAMP                               |

|    |          |        |   |                           |                                                                                                                                                                                                                                                                                                                                                                                                                                                                                                                                                                                                                                                                                                                          |                      |
|----|----------|--------|---|---------------------------|--------------------------------------------------------------------------------------------------------------------------------------------------------------------------------------------------------------------------------------------------------------------------------------------------------------------------------------------------------------------------------------------------------------------------------------------------------------------------------------------------------------------------------------------------------------------------------------------------------------------------------------------------------------------------------------------------------------------------|----------------------|
| 28 | 6p21.1   | 0.0877 | 4 | chr6:41292490-41342376    | 1 gene: TREML4                                                                                                                                                                                                                                                                                                                                                                                                                                                                                                                                                                                                                                                                                                           |                      |
| 29 | 16p13.12 | 0.0877 | 2 | chr16:14139929-14166178   | 1 gene: MKL2                                                                                                                                                                                                                                                                                                                                                                                                                                                                                                                                                                                                                                                                                                             |                      |
| 30 | 2p11.2   | 0.125  | 2 | chr2:85892717-85927786    | 1 gene: ST3GAL5                                                                                                                                                                                                                                                                                                                                                                                                                                                                                                                                                                                                                                                                                                          |                      |
| 31 | 13q32.3  | 0.133  | 1 | chr13:1-114142980         | 302 genes                                                                                                                                                                                                                                                                                                                                                                                                                                                                                                                                                                                                                                                                                                                | <b>RB1, LATS2</b>    |
| 32 | 1p36.13  | 0.149  | 2 | chr1:19552461-19610776    | 1 gene: CAPZB                                                                                                                                                                                                                                                                                                                                                                                                                                                                                                                                                                                                                                                                                                            |                      |
| 33 | 4p12     | 0.153  | 2 | chr4:47936218-47954681    | 1 gene: TEC                                                                                                                                                                                                                                                                                                                                                                                                                                                                                                                                                                                                                                                                                                              |                      |
| 34 | 1p36.11  | 0.155  | 3 | chr1:25408676-28385091    | 64 genes: CD52, EXTL1, EYA3, FGR, IFI6, SFN, GPR3, HMGN2, STMN1, PAFAH2, PPP1R8, PTAFR, RHCE, RHD, RPA2, RPS6KA1, SLC9A1, SLC30A2, ARID1A, NR0B2, FCN3, MAP3K6, C1orf38, WASF2, CNKSR1, NUDC, WDTC1, TMEM50A, STX12, SYF2, LDLRAP1, AHDC1, SMPDL3B, ZNF593, ATPBD1B, AIM1L, XKR8, TMEM57, PIGV, FAM54B, C1orf63, MAN1C1, SEPN1, GPATCH3, CCDC21, C1orf135, LIN28, GRRP1, DHDDS, SH3BGRL3, C1orf160, ZDHHC18, TRIM63, SYTL1, UBXD5, FAM46B, C1orf172, PDIK1L, PAQR7, FAM76A, ZNF683, CATSPER4, LOC388610, CD164L2                                                                                                                                                                                                         | <b>SFN</b>           |
| 35 | 8q12.3   | 0.155  | 2 | chr8:60048458-67666248    | 23 genes: hsa-mir-124a-2, ASPH, CA8, CRH, MYBL1, PDE7A, RAB2A, TTPA, GGH, CYP7B1, MTFR1, TOX, RRS1, BHLHB5, ARMC1, CHD7, TRIM55, DNAJC5B, ADHFE1, RLBPL1L, YTHDF3, C8orf46, NKAIN3                                                                                                                                                                                                                                                                                                                                                                                                                                                                                                                                       |                      |
| 36 | 14q11.2  | 0.155  | 6 | chr14:19800971-22103068   | 43 genes: ANG, APEX1, HNRNPC, NP, RNASE1, RNASE2, RNASE3, RNASE4, RNASE6, SALL2, TEP1, TOX4, PARP2, FAM12A, SUPT16H, OR10G3, OR10G2, OR4E2, SLC39A2, ZNF219, OSGEP, FLJ10357, METTL3, RPGRIP1, NDRG2, CHD8, CCNB1IP1, FAM12B, METT11D1, RNASE7, RAB2B, TMEM55B, TTC5, RNASE11, TPPP2, RNASE8, KLHL33, RNASE10, OR6S1, RNASE9, OR5AU1, RNASE13, RNASE12                                                                                                                                                                                                                                                                                                                                                                   | <b>ZNF219, NDRG2</b> |
| 37 | 11q22.3  | 0.163  | 3 | chr11:103469638-116739377 | 89 genes: hsa-mir-34c, ACAT1, APOA1, APOA4, APOC3, ATM, CASP1, CASP4, CASP5, CRYAB, DDX10, DLAT, DRD2, FDX1, GRIA4, GUCY1A2, HSPB2, HTR3A, IL18, NCAM1, NNMT, NPAT, PAFAH1B2, POU2AF1, PPP2R1B, PTS, RDX, SDHD, SLN, TAGLN, ZBTB16, CUL5, ZNF259, PCSK7, HTR3B, ZW10, RBM7, CEP164, EXPH5, SNF1LK2, KIAA0999, BACE1, CADM1, REXO2, TIMM8B, SIDT2, C11orf71, SLC35F2, RAB39, BTG4, FAM55D, TTC12, C11orf57, ELMOD1, TEX12, ARHGAP20, USP28, ICEBERG, AASDHPT, C11orf1, ALG9, PDGFD, TMPRSS5, BCDO2, KIAA1826, BUD13, DIXDC1, ZC3H12C, ALKBH8, LOC91893, C11orf52, COP1, APOA5, PIH1D2, FAM55A, KBTBD3, CWF19L2, KDEL2, LAYN, C11orf65, ANKK1, RNF214, C11orf53, LOC399947, FLJ45803, FLJ46266, INCA, LOC643923, LOC644672 | <b>ATM, CADM1</b>    |
| 38 | 8q22.1   | 0.169  | 4 | chr8:95625564-95627290    | 1 gene: KIAA1429                                                                                                                                                                                                                                                                                                                                                                                                                                                                                                                                                                                                                                                                                                         |                      |
| 39 | 5q33.1   | 0.205  | 2 | chr5:151480736-151502520  | 1 gene: GLRA1                                                                                                                                                                                                                                                                                                                                                                                                                                                                                                                                                                                                                                                                                                            |                      |
| 40 | 4q31.3   | 0.223  | 2 | chr4:153897161-153915365  | 1 gene: TIGD4                                                                                                                                                                                                                                                                                                                                                                                                                                                                                                                                                                                                                                                                                                            |                      |

1. Rank according to Q-value. Q-value are false-discovery rate corrected.  
2. Cytoband from the middle of the minimal common region.  
3. Region represents the wider area that results when the samples defining each border of the minimal common region are left out.  
4. Genes of interest related to region:  
**Genes in bold** represent the most significantly deleted genes in cancer from Beroukhi *et al.* (PMID: 20164920, Supplementary Table 2: GISTIC analysis of 3,131 cancer specimens of 26 tumor types).  
*Genes in italics* represent genes that are in the region that are mentioned in the text  
Genes with \* represent genes adjacent to the region



**Supplementary Table 2 - Summary of studies used in consensus analysis**

| <b>STUDIES</b>          | <b>Year of Publication</b> | <b>Number of Samples</b> | <b>Genomic Array</b> | <b>Resolution</b> | <b>Regions Defined</b> |
|-------------------------|----------------------------|--------------------------|----------------------|-------------------|------------------------|
| <b>Mao et al.</b>       | 2002                       | 10                       | CGH                  | Low               | From Table 1           |
| <b>Mao et al.</b>       | 2003                       | 9                        | CGH                  | Low               | From Table 1           |
| <b>Fischer et al.</b>   | 2004                       | 4                        | CGH                  | Low               | From Table 1           |
| <b>Vermeer et al.</b>   | 2008                       | 20                       | CGH                  | 3.5K              | By Authors             |
| <b>Caprini et al.</b>   | 2009                       | 26                       | SNP                  | 10K               | By Authors             |
| <b>Laharanne et al.</b> | 2010                       | 16                       | CGH                  | 105K              | By Authors             |
| <b>Lin et al.</b>       | current study              | 23                       | SNP                  | 1800K             | By Authors             |

### Supplementary Table 3: Leukemic CTCL cell lines

|                   |                                                     |                                                                                      |                                                                                      |                                                                                      |                                                     |                                                                                                                        |                                                                                    |
|-------------------|-----------------------------------------------------|--------------------------------------------------------------------------------------|--------------------------------------------------------------------------------------|--------------------------------------------------------------------------------------|-----------------------------------------------------|------------------------------------------------------------------------------------------------------------------------|------------------------------------------------------------------------------------|
| Cell Line Name    | HUT78                                               | HUT78                                                                                | Myla                                                                                 | SeAx                                                                                 | HH                                                  | Pno                                                                                                                    | Sez4                                                                               |
| Other Designation | HUT-Foss                                            | HUT-Lars                                                                             | -                                                                                    | -                                                                                    | -                                                   | -                                                                                                                      | SZ-4                                                                               |
| Obtained From     | Francine Foss (Yale University; New Haven, CT, USA) | Emmanuel Contassot and Lars French (University Hospital Zurich; Zurich, Switzerland) | Emmanuel Contassot and Lars French (University Hospital Zurich; Zurich, Switzerland) | Emmanuel Contassot and Lars French (University Hospital Zurich; Zurich, Switzerland) | Francine Foss (Yale University; New Haven, CT, USA) | Martine Bagot, Armand Bensussan, Anne Marie-Cardine (INSERM; Paris, France)                                            | Eric Vonderheid and Alain Rook (University of Pennsylvania; Philadelphia, PA, USA) |
| Culture Media     | IMDM, 20% FCS, L-Glutamine, Pen/Strep               | IMDM, 20% FCS, L-Glutamine, Pen/Strep                                                | RPMI 1640, 10% FCS, L-Glutamine, Pen/Strep                                           | RPMI 1640, 10% FCS, L-Glutamine, Pen/Strep; 20ng/ml IL2 (R&D Systems)                | RPMI 1640, 10% FCS, L-Glutamine, Pen/Strep          | RPMI 1640, 10% human serum, Na Pyruvate, L-Glutamine, Pen/Strep, 20 ng/ml IL2 (R&D Systems), 5 ng/mL IL7 (R&D Systems) | RPMI 1640, 10% FCS, L-Glutamine, Pen/Strep; 20ng/ml IL2 (R&D Systems)              |
| Origin            | PBMC                                                | PBMC                                                                                 | plaque biopsy                                                                        | PBMC                                                                                 | PBMC                                                | PBMC                                                                                                                   | Sez4                                                                               |
| Reference         | Gazdar et al., Blood 55 (3): 409, 1980              | Gazdar et al., Blood 55 (3): 409, 1980                                               | Kaltoft et al., In Vitro Cell. Dev. Biol. 28A:161, 1992                              | Kaltoft et al., Arch Dermatol Res (1987) 279:293.                                    | Starkebaum et al., Int. J. Cancer: 49:246 (1991)    | Poszepczynska et al., Blood 96 (3): 1056 (2000)                                                                        | Abrams et al., J Invest Dermatol 96:31 (1991)                                      |

**Supplementary Table 4a: Significant regions of DNA copy number amplification in leukemic CTCL cell lines**

| Rank | Cytoband | Q-Value | Number of Samples | Region                   | Genes in region                                                                                                                                                                                                                                                                                                                                                                                                                                                                                                                                                                                                                                                                                                                                      | Genes of interest related to region |
|------|----------|---------|-------------------|--------------------------|------------------------------------------------------------------------------------------------------------------------------------------------------------------------------------------------------------------------------------------------------------------------------------------------------------------------------------------------------------------------------------------------------------------------------------------------------------------------------------------------------------------------------------------------------------------------------------------------------------------------------------------------------------------------------------------------------------------------------------------------------|-------------------------------------|
| 1    | 8q24.21  | 0.11    | 4                 | chr8:126774747-134898335 | 17 genes: <i>ADCY8, KCNQ3, MYC, ST3GAL1, SLA, TG, WISP1, NDRG1, EFR3A, LRRC6, DDEF1, PHF20L1, FAM49B, MLZE, TMEM71, FAM84B, OC9</i>                                                                                                                                                                                                                                                                                                                                                                                                                                                                                                                                                                                                                  | <b>MYC</b>                          |
| 2    | 4q24     | 0.12    | 2                 | chr4:97279410-104277847  | 32 genes: <i>ADH1A, ADH1B, ADH1C, ADH4, ADH5, ADH6, ADH7, CENPE, EIF4E, H2AFZ, MANBA, MTPP, NFKB1, PPP3CA, RAP1GDS1, UBE2D3, MAP2K1IP1, TSPAN5, METAP1, DAPP1, EMCN, BANK1, BDH2, SLC39A8, DNAJB14, C4orf17, RG9MTD2, DDIT4L, NHEDC2, NHEDC1, C4orf37, CISD2</i>                                                                                                                                                                                                                                                                                                                                                                                                                                                                                     | -                                   |
| 3    | 4q25     | 0.12    | 2                 | chr4:1-191273063         | 722 genes                                                                                                                                                                                                                                                                                                                                                                                                                                                                                                                                                                                                                                                                                                                                            | -                                   |
| 4    | 4q26     | 0.12    | 2                 | chr4:116980729-130457903 | 44 genes: <i>ANXA5, CCNA2, FABP2, FGF2, IL2, MAD2L1, EXOSC9, TRPC3, PRSS12, PDE5A, NDST3, SEC24D, SPRY1, PGRMC2, PLK4, PRDM5, NUDT6, HSPA4L, INTU, MYOZ2, USP53, LARP2, BBS7, ANKRD50, KIAA1627, IL21, C4orf31, FAT4, TNIP3, PHF17, C4orf29, SLC25A31, GPR103, KIAA1109, SCLT1, C4orf33, TMEM155, ADAD1, TRAM1L1, SPATA5, BBS12, SYNPO2, MFSD8, LOC401152</i>                                                                                                                                                                                                                                                                                                                                                                                        | -                                   |
| 5    | 8q21.3   | 0.14    | 4                 | chr8:82816542-105436183  | 94 genes: <i>hsa-mir-875, ATP6V1C1, OSGIN2, CA1, CA2, CA3, CALB1, RUNX1T1, CDH17, COX6C, DECR1, E2F5, GEM, KCNS2, MATN2, MMP16, NBN, ODF1, POLR2K, RPL30, SDC2, SPAG1, STK3, KLF10, UQCRB, YWHAZ, FZD6, RIPK2, CPNE3, CCNE2, RIMS2, PTDSS1, HRSP12, PGCP, POP1, WWP1, RAD54B, WDSOF1, RNF19A, KIAA1429, RGS22, PABPC1, RRM2B, MTERFD1, FAM82B, ZNF706, UBR5, AZIN1, OTUD6B, PPM2C, CNGB3, RBM35A, LAPTM4B, TMEM55A, INTS8, SNX16, NECAB1, PLEKHF2, NPAL2, BAALC, GRHL2, SLC25A32, TM7SF4, NCALD, LRRC1, TSPYL5, PSKH2, TMEM67, MTDH, CHMP4C, TP53INP1, SLC26A7, CTHRC1, OSR2, FAM92A1, C8orf38, WDR21C, RALYL, ANKRD46, C8orf37, VPS13B, SLC7A13, CNBD1, SNX31, TMEM64, C8orf47, ATP6V0D2, REXO1L1, DPY19L4, FBXO43, CA13, RBM12B, GDF6, C8orf59</i> | -                                   |
| 6    | 20q11.21 | 0.17    | 1                 | chr20:1-62435964         | 524 genes                                                                                                                                                                                                                                                                                                                                                                                                                                                                                                                                                                                                                                                                                                                                            | <b>CRKL</b>                         |

1. Rank according to Q-value. Q-value are false-discovery rate corrected.

2. Cytoband from the middle of the minimal common region.

3. Region represents the wider area that results when the samples defining each border of the minimal common region are left out.

4. Genes of interest related to region:

**Genes in bold** represent significantly amplified genes in cancer from Beroukhim *et al.* (PMID: 20164920, Supplementary Table 2: GISTIC analysis of 3,131 cancer specimens of 26 tumor types).

*Genes in italics* represent genes that are in the region that are mentioned in the text

Genes with \* represent genes adjacent to the region

**Supplementary Table 4b: Significant regions of DNA copy number deletion in leukemic CTCL cell lines**

| Rank | Cytoband | Q-value  | Number of samples | Region                   | Genes in region                                                                                                                                                                                                                                                                                                                                                                                                                                                                                                                                                                                                                                                                                                                                                                                                                                                        | Genes of interest related to region        |
|------|----------|----------|-------------------|--------------------------|------------------------------------------------------------------------------------------------------------------------------------------------------------------------------------------------------------------------------------------------------------------------------------------------------------------------------------------------------------------------------------------------------------------------------------------------------------------------------------------------------------------------------------------------------------------------------------------------------------------------------------------------------------------------------------------------------------------------------------------------------------------------------------------------------------------------------------------------------------------------|--------------------------------------------|
| 1    | 9p21.3   | 2.99E-05 | 4                 | chr9:20944461-22057275   | 23 genes: <i>hsa-mir-31</i> , <i>CDKN2A</i> , <i>CDKN2B</i> , <i>IFNA1</i> , <i>IFNA2</i> , <i>IFNA4</i> , <i>IFNA5</i> , <i>IFNA6</i> , <i>IFNA7</i> , <i>IFNA8</i> , <i>IFNA10</i> , <i>IFNA13</i> , <i>IFNA14</i> , <i>IFNA16</i> , <i>IFNA17</i> , <i>IFNA21</i> , <i>IFNB1</i> , <i>IFNW1</i> , <i>MTAP</i> , <i>KIAA1797</i> , <i>KLHL9</i> , <i>IFNE1</i> , <i>PTPLAD2</i>                                                                                                                                                                                                                                                                                                                                                                                                                                                                                      | <b>CDKN2A</b>                              |
| 2    | 4q35.1   | 0.12267  | 3                 | chr4:171099753-185609300 | 34 genes: <i>AGA</i> , <i>DCTD</i> , <i>GPM6A</i> , <i>HMGB2</i> , <i>HPGD</i> , <i>ING2</i> , <i>IRF2</i> , <i>VEGFC</i> , <i>GLRA3</i> , <i>SAP30</i> , <i>HAND2</i> , <i>MFAP3L</i> , <i>MORF4</i> , <i>ADAM29</i> , <i>SCRG1</i> , <i>FBXO8</i> , <i>AADAT</i> , <i>GALNT7</i> , <i>CLDN22</i> , <i>NEIL3</i> , <i>CDKN2AIP</i> , <i>ODZ3</i> , <i>STOX2</i> , <i>SPCS3</i> , <i>C4orf41</i> , <i>WWC2</i> , <i>KIAA1712</i> , <i>WDR17</i> , <i>SPATA4</i> , <i>ENPP6</i> , <i>ASB5</i> , <i>RWDD4A</i> , <i>LOC285501</i> , <i>GALNT17</i>                                                                                                                                                                                                                                                                                                                       | <b>FRG2*</b> , <b>TUBB4Q*</b>              |
| 3    | 6q21     | 0.21278  | 3                 | chr6:103244744-113499286 | 53 genes: <i>hsa-mir-587</i> , <i>AIM1</i> , <i>AMD1</i> , <i>PRDM1</i> , <i>FOXO3</i> , <i>FYN</i> , <i>GPR6</i> , <i>LAMA4</i> , <i>PREP</i> , <i>REV3L</i> , <i>SMPD2</i> , <i>NR2E1</i> , <i>DDO</i> , <i>SNX3</i> , <i>CD164</i> , <i>WISP3</i> , <i>WASF1</i> , <i>ATG5</i> , <i>ZBTB24</i> , <i>FIG4</i> , <i>TRAF3IP2</i> , <i>BVES</i> , <i>SEC63</i> , <i>CDC2L6</i> , <i>SESN1</i> , <i>OSTM1</i> , <i>TUBE1</i> , <i>C6orf203</i> , <i>CDC40</i> , <i>SOBP</i> , <i>QRSL1</i> , <i>PDSS2</i> , <i>HACE1</i> , <i>KIAA1553</i> , <i>POPDC3</i> , <i>MICAL1</i> , <i>ARMC2</i> , <i>BXDC1</i> , <i>RTN4IP1</i> , <i>SLC22A16</i> , <i>KIAA1919</i> , <i>GTF3C6</i> , <i>SLC16A10</i> , <i>C6orf199</i> , <i>C6orf224</i> , <i>LACE1</i> , <i>SCML4</i> , <i>C6orf182</i> , <i>PPIL6</i> , <i>LIN28B</i> , <i>FLJ42177</i> , <i>RFPL4B</i> , <i>LOC619208</i> | <b>GTF3C6</b> , <b>TUBE1</b> , <b>ROS1</b> |
| 4    | 10q23.31 | 0.21951  | 3                 | chr10:89718107-95455172  | 44 genes: <i>hsa-mir-107</i> , <i>ACTA2</i> , <i>FAS</i> , <i>CYP26A1</i> , <i>HHEX</i> , <i>HTR7</i> , <i>IDE</i> , <i>IFIT2</i> , <i>IFIT1</i> , <i>IFIT3</i> , <i>KIF11</i> , <i>LIPA</i> , <i>PDE6C</i> , <i>PPP1R3C</i> , <i>PTEN</i> , <i>RBP4</i> , <i>LIPF</i> , <i>CH25H</i> , <i>BTA1F1</i> , <i>MPHOSPH1</i> , <i>RPP30</i> , <i>CPEB3</i> , <i>IFIT5</i> , <i>FER1L3</i> , <i>ANKRD1</i> , <i>PANK1</i> , <i>EXOC6</i> , <i>MARCH5</i> , <i>CEP55</i> , <i>C10orf59</i> , <i>STAMBPL1</i> , <i>TNKS2</i> , <i>PCGF5</i> , <i>C10orf4</i> , <i>ANKRD22</i> , <i>LIPJ</i> , <i>HECTD2</i> , <i>FGFBP3</i> , <i>GPR120</i> , <i>CYP26C1</i> , <i>SLC16A12</i> , <i>IFIT1L</i> , <i>LIPK</i> , <i>LIPN</i>                                                                                                                                                     | <b>PTEN</b> , <b>FAS</b>                   |

1. Rank according to Q-value. Q-value are false-discovery rate corrected.

2. Cytoband from the middle of the minimal common region.

3. Region represents the wider area that results when the samples defining each border of the minimal common region are left out.

4. Genes of interest related to region:

**Genes in bold** represent the most significantly deleted genes in cancer from Beroukhim *et al.* (PMID: 20164920, Supplementary Table 2: GISTIC analysis of 3,131 cancer specimens of 26 tumor types).

*Genes in italics* represent genes that are in the region that are mentioned in the text

Genes with \* represent genes adjacent to the region

Supplementary Table 5 - FACS data from leukemic CTCL patients

| Name       | Population Isolated | CD4+/CD8+Ratio | %CD3  | %CD4  | %CD8    | %CD4+CD26+ | %CD4+CD26- | %CD4+CD7+ | %CD4+CD7- | %CD25(IL2R) | %CD4+CD25+ | %CD45RO | %Vbeta                                     |
|------------|---------------------|----------------|-------|-------|---------|------------|------------|-----------|-----------|-------------|------------|---------|--------------------------------------------|
| REFERENCE  |                     | 0.8-3.5        | 58-86 | 25-65 | 12.0-44 | 10.0-54    | 2.0-18     | 32-55     | 4.0-6     | 0-4         | 1.0-10     | 15-40   | N/A                                        |
| Patient 01 | CD4+                | 1.7            | -     | 46    | -       | 22         | 10         | 44        | 9         | 41          | 11         | 61      | N/A                                        |
| Patient 02 | CD4+CD7-CD26-       | 1.6            | 64    | 62    | 39.81   | 11         | 45         | 16        | 51        | 25          | 10         | 65      | N/A                                        |
| Patient 03 | CD4+                | 2.9            | 53    | 52    | 17.67   | 28         | 15         | 32        | 18        | 27          | 9          | 35      | Valpha12.1 7% REF(2-4.8)                   |
| Patient 04 | CD4+CD7-            | 38             | 32    | 85    | 2.24    | 76         | 12         | 26        | 58        | 25          | 40         | 73      | N/A                                        |
| Patient 05 | CD4+CD7-CD26-       | 100            | -     | 100   | -       | 0          | 100        | 1         | 99        | 9           | 2          | 99      | N/A                                        |
| Patient 06 | CD4+                | 2.3            | -     | 48    | -       | 21         | 12         | 43        | 12        | 34          | 12         | 50      | N/A                                        |
| Patient 07 | CD4+                | 0.79           | -     | 27    | -       | 11         | 5          | 29        | 4         | 19          | 4          | 29      | N/A                                        |
| Patient 08 | CD4+                | 0.28           | -     | 10    | -       | 6          | 2          | 19        | 4         | 11          | 1          | 49      | VB8A 7% REF(1.8-4.2)                       |
| Patient 09 | CD4+                | 1.2            | -     | 33    | -       | 15         | 11         | 34        | 13        | 35          | 8          | 63      | N/A                                        |
| Patient 10 | CD4+CD26-           | 19.7           | 86    | 89    | 4.53    | 4          | 84         | 71        | 18        | 51          | 43         | 53      | VB2 79% REF(1.5-7.5)                       |
| Patient 11 | CD4+CD7-CD26-       | 3.5            | -     | 50    | -       | 15         | 32         | 23        | 25        | 13          | 8          | 44      | N/A                                        |
| Patient 12 | CD4+CD7-CD26-       | 2.8            | 85    | 47    | 16.54   | 8          | 24         | 16        | 55        | 31          | 8          | 57      | N/A                                        |
| Patient 13 | CD4+                | 1.6            | 54    | 39    | 24      | 9          | 13         | 32        | 15        | 18          | 2          | 40      | N/A                                        |
| Patient 14 | CD4+CD26-           | 40.8           | -     | 64    | -       | 6          | 60         | 57        | 17        | 44          | 59         | 70      | N/A                                        |
| Patient 15 | CD4+                | 1.4            | 51    | 24    | 17.06   | 8          | 4          | 33        | 6         | 26          | 2          | 41      | VB5a 41%; REF(0-1.3)                       |
| Patient 16 | CD4+CD7-CD26-       | 4.9            | 79    | 68    | 13.92   | 13         | 55         | 18        | 50        | 30          | 14         | 73      | VB5a 7% REF(0-1.3)                         |
| Patient 17 | CD4+                | 3.3            | -     | 59    | -       | 35         | 15         | 58        | 9         | 45          | 16         | 46      | N/A                                        |
| Patient 18 | CD4+CD26-           | 3.6            | -     | 58    | -       | 7          | 38         | 53        | 6         | 39          | 9          | 58      | VB5c 38% REF(1.6-7.2)                      |
| Patient 19 | CD4+                | 3.1            | -     | 45    | -       | 24         | 10         | 52        | 6         | 23          | 7          | 33      | N/A                                        |
| Patient 20 | CD4+CD7-CD26-       | 3.4            | 83    | 56    | 16.59   | 9          | 34         | 32        | 32        | 28          | 1          | 53      | VB3 10% REF(0-5.9); VB13.3 5% REF(0.5-1.7) |
| Patient 21 | CD4+CD7-CD26-       | 7.5            | 44    | 41    | 5.5     | 34         | 17         | 3         | 48        | 12          | 19         | 69      | N/A                                        |
| Patient 22 | CD4+                | 7.6            | -     | 62    | -       | 38         | 7          | 64        | 3         | 55          | 27         | 24      | VB5c 6% REF(0-1.3)                         |
| Patient 24 | CD4+                | 3.1            | -     | 44    | -       | 14         | 1          | 49        | 2         | 9           | 1          | 12      | N/A                                        |
| Patient 25 | CD4+                | 1.2            | -     | 45    | -       | 37         | 10         | 49        | 2         | 7           | 4          | 22      | N/A                                        |
